# Supplementary material
Source: PubMed Central journal article supplement (PMC7183163)
Supplement: pnas.1915841117.sapp.pdf [file pnas.1915841117.sapp.pdf]

1

2 **Supplementary Information for**  
3 **Scaling Up Psychology via Scientific Regret Minimization**

4 **Mayank Agrawal, Joshua C. Peterson, Thomas L. Griffiths**

5 **Mayank Agrawal.**

6 **E-mail: [mayank.agrawal@princeton.edu](mailto:mayank.agrawal@princeton.edu)**

7 **This PDF file includes:**

- 8     Supplementary text
- 9     Figs. S1 to S2
- 10    Tables S1 to S16
- 11    References for SI reference citations

## 12 **Supporting Information Text**

13 **Bayesian Feature Selection.** To simulate an alternative approach towards exploratory data analysis, we conducted a form of  
14 Bayesian feature selection (1). We trained a Bayesian logistic regression model with all ‘Hybrid’ model features and their two-  
15 and three-way interactions. Each weight was given a prior of a Gaussian distribution with mean 0 and standard deviation 0.1.  
16 Once this model was trained, all features in which a weight of 0 was located in its 95% credible interval were removed. We then  
17 trained this new model, and repeated this procedure until all features that were fit were significant. (More computationally  
18 intensive variable selection procedures, such as marginal likelihood, were infeasible given the size of the dataset). Table S15  
19 outlines the iterations’ metrics and Table S16 reports the final features and their weights.

20 The resulting model from this approach performed a little better than the original ‘Hybrid’ model and far worse than our  
21 final choice model (and in fact worse than the model after our first iteration). It seems that for such an approach to rival ours,  
22 we would have needed to start off with a model that encapsulated at least all twenty-way interactions. Such a model would be  
23 even more intractable to conduct for Bayesian feature selection.

24 **Methods.** Due to the size of the dataset and the feature set, this model was trained through variational inference (2) rather  
25 than traditional MCMC sampling. The model was trained using a Flipout gradient estimator (3) and optimized via Adam (4).  
26 Metrics were computed by taking the MAP estimate of each weight. The model was trained using the Tensorflow Probability  
27 package (5) .

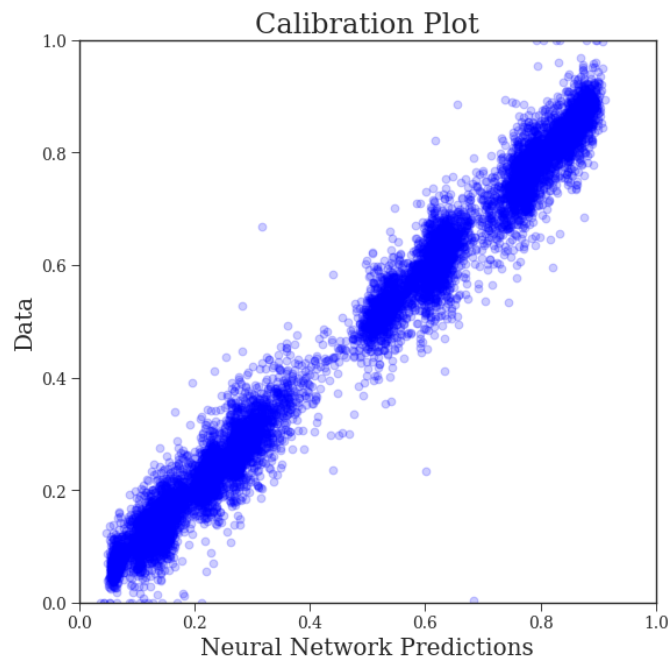

**Fig. S1.** A calibration plot between the neural network's predictions and the aggregate dilemmas for all dilemmas over one hundred responses. We calculated a line of best fit for all dilemmas (*i.e.* not just those with over hundred responses), weighting each dilemma by the number of participants that answered it. The line of best fit had a slope of 1.003 and an intercept of 0.001.

Table S1. Old vs. Young Dilemmas (proportions show observed or predicted proportion killing left side).

|   | N     | Data  | Choice Model | Neural Network |
|------------------------------------------------------------------------------------|-------|-------|--------------|----------------|
|   | 11554 | 0.343 | 0.636        | 0.333          |
|   | 11578 | 0.362 | 0.637        | 0.344          |
|   | 7166  | 0.721 | 0.511        | 0.747          |
|   | 5758  | 0.523 | 0.635        | 0.403          |
|  | 5691  | 0.476 | 0.625        | 0.395          |

**Table S2. Biggest Differences Between Choice Model and Data for Second Iteration**

|   | N    | Data  | Choice Model | Neural Network |
|------------------------------------------------------------------------------------|------|-------|--------------|----------------|
|   | 649  | 0.994 | 0.164        | 0.168          |
|   | 1124 | 0.000 | 0.600        | 0.442          |
|   | 1113 | 0.288 | 0.791        | 0.680          |
|   | 890  | 0.001 | 0.396        | 0.272          |
|  | 365  | 0.326 | 0.709        | 0.719          |

**Table S3. Biggest Differences Between Choice Model and Neural Network for Second Iteration**

|    | N    | Data  | Choice Model | Neural Network |
|-------------------------------------------------------------------------------------|------|-------|--------------|----------------|
|    | 130  | 0.600 | 0.869        | 0.537          |
|   | 1471 | 0.434 | 0.712        | 0.394          |
|  | 2898 | 0.436 | 0.714        | 0.420          |
|  | 3879 | 0.520 | 0.786        | 0.509          |
|  | 3377 | 0.224 | 0.508        | 0.231          |

**Table S4. Biggest Differences Between Choice Model and Data for Third Iteration**

|    | N    | Data  | Choice Model | Neural Network |
|-------------------------------------------------------------------------------------|------|-------|--------------|----------------|
|    | 649  | 0.994 | 0.155        | 0.168          |
|   | 1124 | 0.000 | 0.605        | 0.442          |
|  | 1113 | 0.288 | 0.806        | 0.680          |
|  | 890  | 0.001 | 0.693        | 0.272          |
|  | 365  | 0.326 | 0.709        | 0.719          |

**Table S5. Biggest Differences Between Choice Model and Neural Network for Third Iteration**

|    | N    | Data  | Choice Model | Neural Network |
|-------------------------------------------------------------------------------------|------|-------|--------------|----------------|
|    | 162  | 0.599 | 0.835        | 0.567          |
|   | 2606 | 0.558 | 0.765        | 0.499          |
|  | 8235 | 0.340 | 0.637        | 0.373          |
|  | 175  | 0.269 | 0.541        | 0.283          |
|  | 359  | 0.315 | 0.539        | 0.290          |



**Table S6. Biggest Differences Between Choice Model and Data for Fourth Iteration**

|    | N    | Data  | Choice Model | Neural Network |
|-------------------------------------------------------------------------------------|------|-------|--------------|----------------|
|    | 649  | 0.994 | 0.147        | 0.168          |
|   | 1124 | 0.000 | 0.517        | 0.442          |
|  | 1113 | 0.288 | 0.763        | 0.680          |
|  | 365  | 0.326 | 0.766        | 0.719          |
|  | 187  | 0.001 | 0.427        | 0.393          |

**Table S7. Biggest Differences Between Choice Model and Neural Network for Fourth Iteration**

|    | N   | Data  | Choice Model | Neural Network |
|-------------------------------------------------------------------------------------|-----|-------|--------------|----------------|
|    | 175 | 0.269 | 0.560        | 0.283          |
|   | 326 | 0.301 | 0.564        | 0.301          |
|  | 359 | 0.315 | 0.552        | 0.290          |
|  | 172 | 0.273 | 0.556        | 0.304          |
|  | 159 | 0.308 | 0.568        | 0.323          |

| Feature                                          | Weight |
|--------------------------------------------------|--------|
| Man                                              | 0.339  |
| Woman                                            | 0.360  |
| Pregnant                                         | 0.502  |
| Stroller                                         | 0.537  |
| Old Man                                          | 0.271  |
| Old Woman                                        | 0.264  |
| Boy                                              | 0.452  |
| Girl                                             | 0.466  |
| Homeless                                         | 0.208  |
| Large Woman                                      | 0.234  |
| Large Man                                        | 0.165  |
| Criminal                                         | -0.093 |
| Male Executive                                   | 0.351  |
| Female Executive                                 | 0.371  |
| Female Athlete                                   | 0.448  |
| Male Athlete                                     | 0.407  |
| Female Doctor                                    | 0.413  |
| Male Doctor                                      | 0.427  |
| Dog                                              | 0.333  |
| Cat                                              | 0.285  |
| Crossing Signal                                  | 1.115  |
| Car Side                                         | -0.427 |
| Humans vs. Animals                               | 1.034  |
| Car Side on Humans                               | 0.828  |
| Car Side on Animals                              | -0.207 |
| Legally Crossing Humans                          | -0.653 |
| Illegally Crossing Humans                        | 0.313  |
| Car Side on Legally Crossing Humans              | -0.303 |
| Car Side on Illegally Crossing Humans            | 0.189  |
| Car Side on Legally Crossing Animals             | -0.124 |
| Car Side on Illegally Crossing Animals           | 0.350  |
| Criminals vs. Animals                            | -0.727 |
| Car Side on Criminals                            | -0.427 |
| Car Side on Animals                              | 0.300  |
| Legally Crossing Criminals                       | 0.045  |
| Illegally Crossing Criminals                     | 0.226  |
| Car Side on Legally Crossing Criminals           | 0.056  |
| Car Side on Illegally Crossing Criminals         | 0.232  |
| Car Side on Legally Crossing Animals             | 0.006  |
| Car Side on Illegally Crossing Animals           | 0.011  |
| Pregnant vs. Other Humans                        | 0.338  |
| Car Side on Pregnant                             | 0.347  |
| Car Side on Other Humans                         | 0.009  |
| Legally Crossing Pregnant                        | -0.109 |
| Illegally Crossing Pregnant                      | -0.121 |
| Car Side on Legally Crossing Pregnant            | -0.162 |
| Car Side on Illegally Crossing Pregnant          | -0.068 |
| Car Side on Legally Crossing Other Humans        | 0.053  |
| Car Side on Illegally Crossing Other Humans      | -0.053 |
| Pregnant & Doctor vs. Other Humans               | 0.490  |
| Car Side on Pregnant & Doctor                    | 0.699  |
| Car Side on Other Humans                         | 0.208  |
| Legally Crossing Pregnant & Doctor               | -0.330 |
| Illegally Crossing Pregnant & Doctor             | -0.275 |
| Car Side on Legally Crossing Pregnant & Doctor   | -0.358 |
| Car Side on Illegally Crossing Pregnant & Doctor | -0.363 |

|                                                   |        |
|---------------------------------------------------|--------|
| Car Side on Legally Crossing Other Humans         | -0.087 |
| Car Side on Illegally Crossing Other Humans       | -0.028 |
| Executive & Doctor vs. Other Humans               | 0.150  |
| Car Side on Executive & Doctor                    | 0.056  |
| Car Side on Other Humans                          | -0.094 |
| Legally Crossing Executive & Doctor               | -0.059 |
| Illegally Crossing Executive & Doctor             | -0.070 |
| Car Side on Legally Crossing Executive & Doctor   | 0.002  |
| Car Side on Illegally Crossing Executive & Doctor | -0.012 |
| Car Side on Legally Crossing Other Humans         | 0.059  |
| Car Side on Illegally Crossing Other Humans       | 0.061  |
| Doctor vs. Other Humans                           | 0.324  |
| Car Side on Doctor                                | 0.311  |
| Car Side on Other Humans                          | -0.013 |
| Legally Crossing Doctor                           | -0.146 |
| Illegally Crossing Doctor                         | -0.195 |
| Car Side on Legally Crossing Doctor               | -0.177 |
| Car Side on Illegally Crossing Doctor             | -0.208 |
| Car Side on Legally Crossing Other Humans         | -0.013 |
| Car Side on Illegally Crossing Other Humans       | -0.032 |
| Old vs. Young                                     | -0.402 |
| Car Side on Old                                   | -0.680 |
| Car Side on Young                                 | -0.277 |
| Legally Crossing Old                              | 0.221  |
| Illegally Crossing Old                            | 0.252  |
| Car Side on Legally Crossing Old                  | 0.408  |
| Car Side on Illegally Crossing Old                | 0.446  |
| Car Side on Legally Crossing Young                | 0.194  |
| Car Side on Illegally Crossing Young              | 0.187  |
| Adult vs. Young                                   | -0.150 |
| Car Side on Adult                                 | -0.457 |
| Car Side on Young                                 | -0.307 |
| Legally Crossing Adult                            | -0.007 |
| Illegally Crossing Adult                          | 0.053  |
| Car Side on Legally Crossing Adult                | 0.248  |
| Car Side on Illegally Crossing Adult              | 0.336  |
| Car Side on Legally Crossing Young                | 0.283  |
| Car Side on Illegally Crossing Young              | 0.255  |
| Old vs. Adult & Young                             | -0.390 |
| Car Side on Old                                   | -0.722 |
| Car Side on Adult & Young                         | -0.332 |
| Legally Crossing Old                              | 0.223  |
| Illegally Crossing Old                            | 0.233  |
| Car Side on Legally Crossing Old                  | 0.441  |
| Car Side on Illegally Crossing Old                | 0.500  |
| Car Side on Legally Crossing Adult & Young        | 0.267  |
| Car Side on Illegally Crossing Adult & Young      | 0.218  |
| Old & Adult vs. Young                             | -0.207 |
| Car Side on Old & Adult                           | -0.471 |
| Car Side on Young                                 | -0.264 |
| Legally Crossing Old & Adult                      | 0.099  |
| Illegally Crossing Old & Adult                    | 0.223  |
| Car Side on Legally Crossing Old & Adult          | 0.299  |
| Car Side on Illegally Crossing Old & Adult        | 0.421  |
| Car Side on Legally Crossing Young                | 0.198  |
| Car Side on Illegally Crossing Young              | 0.200  |
| Old vs. Adult                                     | -0.309 |
| Car Side on Old                                   | -0.714 |
| Car Side on Adult                                 | -0.405 |
| Legally Crossing Old                              | 0.295  |
| Illegally Crossing Old                            | 0.199  |

|                                              |        |
|----------------------------------------------|--------|
| Car Side on Legally Crossing Old             | 0.464  |
| Car Side on Illegally Crossing Old           | 0.465  |
| Car Side on Legally Crossing Adult           | 0.266  |
| Car Side on Illegally Crossing Adult         | 0.169  |
| Old & Adult vs. Adult & Young                | -0.663 |
| Car Side on Old & Adult                      | 0.145  |
| Car Side on Adult & Young                    | 0.808  |
| Legally Crossing Old & Adult                 | 0.056  |
| Illegally Crossing Old & Adult               | 0.314  |
| Car Side on Legally Crossing Old & Adult     | 0.026  |
| Car Side on Illegally Crossing Old & Adult   | -0.044 |
| Car Side on Legally Crossing Adult & Young   | -0.358 |
| Car Side on Illegally Crossing Adult & Young | -0.031 |
| All Young vs. Other Humans                   | 0.104  |
| Car Side on All Young                        | -0.055 |
| Car Side on Other Humans                     | -0.159 |
| Legally Crossing All Young                   | 0.022  |
| Illegally Crossing All Young                 | 0.015  |
| Car Side on Legally Crossing All Young       | 0.062  |
| Car Side on Illegally Crossing All Young     | 0.041  |
| Car Side on Legally Crossing Other Humans    | 0.026  |
| Car Side on Illegally Crossing Other Humans  | 0.040  |
| Male vs. Female                              | -0.373 |
| Car Side on Male                             | -0.353 |
| Car Side on Female                           | 0.020  |
| Legally Crossing Male                        | 0.204  |
| Illegally Crossing Male                      | 0.159  |
| Car Side on Legally Crossing Male            | 0.440  |
| Car Side on Illegally Crossing Male          | 0.317  |
| Car Side on Legally Crossing Female          | 0.158  |
| Car Side on Illegally Crossing Female        | 0.236  |
| Homeless vs. Other Humans                    | -0.320 |
| Car Side on Homeless                         | -0.146 |
| Car Side on Other Humans                     | 0.174  |
| Legally Crossing Homeless                    | 0.139  |
| Illegally Crossing Homeless                  | 0.134  |
| Car Side on Legally Crossing Homeless        | 0.196  |
| Car Side on Illegally Crossing Homeless      | 0.081  |
| Car Side on Legally Crossing Other Humans    | -0.053 |
| Car Side on Illegally Crossing Other Humans  | 0.057  |
| Executives vs. Homeless                      | 0.001  |
| Car Side on Executives                       | -0.149 |
| Car Side on Homeless                         | -0.150 |
| Legally Crossing Executives                  | -0.029 |
| Illegally Crossing Executives                | 0.024  |
| Car Side on Legally Crossing Executives      | 0.214  |
| Car Side on Illegally Crossing Executives    | 0.187  |
| Car Side on Legally Crossing Homeless        | 0.163  |
| Car Side on Illegally Crossing Homeless      | 0.243  |
| Executives vs. Adult                         | 0.092  |
| Car Side on Executives                       | -0.125 |
| Car Side on Adult                            | -0.217 |
| Legally Crossing Executives                  | 0.042  |
| Illegally Crossing Executives                | -0.214 |
| Car Side on Legally Crossing Executives      | 0.192  |
| Car Side on Illegally Crossing Executives    | 0.044  |
| Car Side on Legally Crossing Adult           | 0.258  |
| Car Side on Illegally Crossing Adult         | 0.150  |
| More vs. Less                                | 0.800  |
| Car Side on More                             | 0.498  |
| Car Side on Less                             | -0.302 |

|                                      |        |
|--------------------------------------|--------|
| Legally Crossing More                | -0.617 |
| Illegally Crossing More              | -0.375 |
| Car Side on Legally Crossing More    | -0.200 |
| Car Side on Illegally Crossing More  | 0.007  |
| Car Side on Legally Crossing Less    | 0.383  |
| Car Side on Illegally Crossing Less  | 0.417  |
| Fat vs. Fit                          | -0.293 |
| Car Side on Fat                      | -0.313 |
| Car Side on Fit                      | -0.021 |
| Legally Crossing Fat                 | 0.305  |
| Illegally Crossing Fat               | 0.194  |
| Car Side on Legally Crossing Fat     | 0.539  |
| Car Side on Illegally Crossing Fat   | 0.360  |
| Car Side on Legally Crossing Fit     | 0.166  |
| Car Side on Illegally Crossing Fit   | 0.233  |
| Fat vs. Adult                        | -0.392 |
| Car Side on Fat                      | -0.479 |
| Car Side on Adult                    | -0.086 |
| Legally Crossing Fat                 | 0.377  |
| Illegally Crossing Fat               | 0.131  |
| Car Side on Legally Crossing Fat     | 0.619  |
| Car Side on Illegally Crossing Fat   | 0.366  |
| Car Side on Legally Crossing Adult   | 0.235  |
| Car Side on Illegally Crossing Adult | 0.241  |
| Adult vs. Fit                        | -0.071 |
| Car Side on Adult                    | -0.271 |
| Car Side on Fit                      | -0.200 |
| Legally Crossing Adult               | 0.204  |
| Illegally Crossing Adult             | -0.063 |
| Car Side on Legally Crossing Adult   | 0.462  |
| Car Side on Illegally Crossing Adult | 0.306  |
| Car Side on Legally Crossing Fit     | 0.369  |
| Car Side on Illegally Crossing Fit   | 0.258  |

**Table S8. Features and Weights for Final Choice Model**

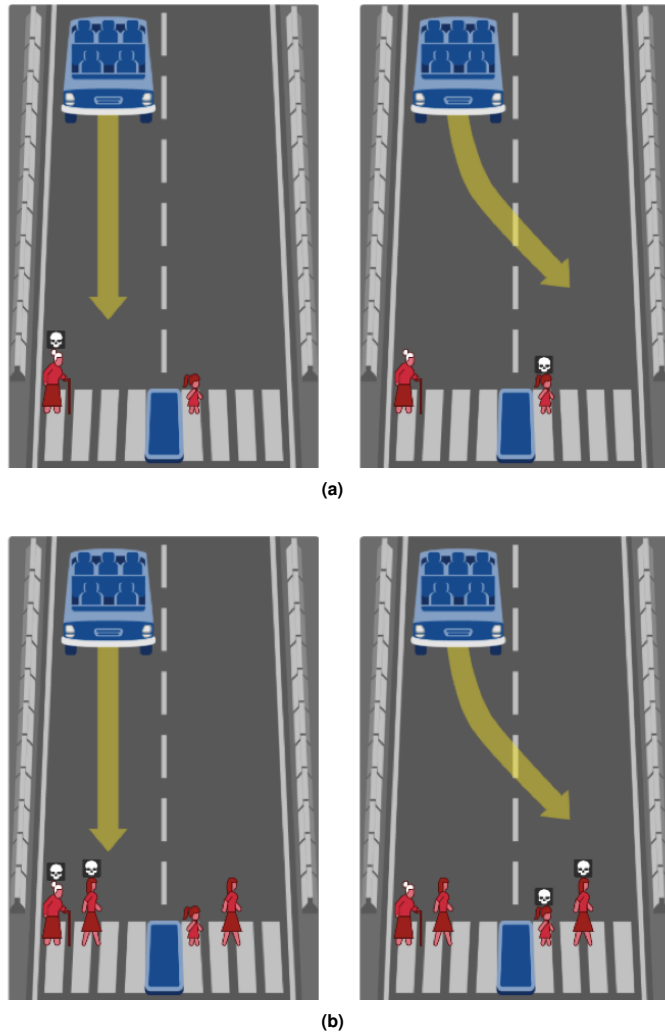

**Fig. S2.** Two Moral Machine dilemmas that demonstrate an age gradient. Rational choice models treat these dilemmas equivalently, but the data indicated that participants do not do so when the side with children is illegally crossing.

| Car Side | Signal (Human) | % Save Criminal | % Save Homeless | <i>p</i> -value | Prediction  |
|----------|----------------|-----------------|-----------------|-----------------|-------------|
| Human    | Legal          | 0.65            | 0.88            | <i>p</i> < .001 | Significant |
| Human    | N/A            | 0.68            | 0.84            | <i>p</i> < .001 | Significant |
| Human    | Illegal        | 0.63            | 0.79            | <i>p</i> < .001 | Significant |
| Dog      | Legal          | 0.78            | 0.89            | <i>p</i> < .001 | Significant |
| Dog      | N/A            | 0.71            | 0.90            | <i>p</i> < .001 | Significant |
| Dog      | Illegal        | 0.69            | 0.83            | <i>p</i> < .001 | Significant |

| Car Side | Signal (Human) | % Save Criminal | % Save Old Man | <i>p</i> -value | Prediction  |
|----------|----------------|-----------------|----------------|-----------------|-------------|
| Human    | Legal          | 0.65            | 0.87           | <i>p</i> < .001 | Significant |
| Human    | N/A            | 0.68            | 0.82           | <i>p</i> < .001 | Significant |
| Human    | Illegal        | 0.63            | 0.81           | <i>p</i> < .001 | Significant |
| Dog      | Legal          | 0.78            | 0.87           | <i>p</i> = .002 | Significant |
| Dog      | N/A            | 0.71            | 0.88           | <i>p</i> < .001 | Significant |
| Dog      | Illegal        | 0.69            | 0.85           | <i>p</i> < .001 | Significant |

| Car Side | Signal (Human) | % Save Criminal | % Save Man | <i>p</i> -value | Prediction  |
|----------|----------------|-----------------|------------|-----------------|-------------|
| Human    | Legal          | 0.65            | 0.89       | <i>p</i> < .001 | Significant |
| Human    | N/A            | 0.68            | 0.85       | <i>p</i> < .001 | Significant |
| Human    | Illegal        | 0.63            | 0.81       | <i>p</i> < .001 | Significant |
| Dog      | Legal          | 0.78            | 0.91       | <i>p</i> < .001 | Significant |
| Dog      | N/A            | 0.71            | 0.89       | <i>p</i> < .001 | Significant |
| Dog      | Illegal        | 0.69            | 0.83       | <i>p</i> < .001 | Significant |

**Table S9. Results from Experiment 1 comparing the percentage of participants that save criminals versus dogs and the percentage of participants that save other humans versus dogs. We used a  $\chi^2$  analysis between the proportions, where  $N = 326$  and  $df = 1$ .**



| Car Side | Signal (Human) | % Save Criminal | N    | % Save Homeless | N    |
|----------|----------------|-----------------|------|-----------------|------|
| Human    | Legal          | 0.50            | 1679 | 0.79            | 1630 |
| Human    | N/A            | 0.44            | 3840 | 0.75            | 3829 |
| Human    | Illegal        | 0.37            | 2597 | 0.61            | 2526 |
| Dog      | Legal          | 0.56            | 2571 | 0.82            | 2638 |
| Dog      | N/A            | 0.52            | 3879 | 0.79            | 3955 |
| Dog      | Illegal        | 0.43            | 1551 | 0.65            | 1600 |

| Car Side | Signal (Human) | % Save Criminal | N    | % Save Old Man | N    |
|----------|----------------|-----------------|------|----------------|------|
| Human    | Legal          | 0.50            | 1679 | 0.80           | 1659 |
| Human    | N/A            | 0.44            | 3840 | 0.76           | 3833 |
| Human    | Illegal        | 0.37            | 2597 | 0.66           | 2538 |
| Dog      | Legal          | 0.56            | 2571 | 0.83           | 2543 |
| Dog      | N/A            | 0.52            | 3879 | 0.81           | 3825 |
| Dog      | Illegal        | 0.43            | 1551 | 0.69           | 1621 |

| Car Side | Signal (Human) | % Save Criminal | N    | % Save Man | N    |
|----------|----------------|-----------------|------|------------|------|
| Human    | Legal          | 0.50            | 1679 | 0.81       | 1642 |
| Human    | N/A            | 0.44            | 3840 | 0.79       | 3889 |
| Human    | Illegal        | 0.37            | 2597 | 0.66       | 2598 |
| Dog      | Legal          | 0.56            | 2571 | 0.85       | 2597 |
| Dog      | N/A            | 0.52            | 3879 | 0.83       | 3873 |
| Dog      | Illegal        | 0.43            | 1551 | 0.69       | 1641 |

Table S10. Results from the Moral Machine dataset corresponding to the scenarios in Experiment 1 / Supplementary Table S9.

(a) Male

| Car Side | Signal (Young) | % Save (with Adult) | % Save (without Adult) | <i>p</i> -value | Prediction  |
|----------|----------------|---------------------|------------------------|-----------------|-------------|
| Young    | Legal          | 0.83                | 0.77                   | <i>p</i> = .013 | Null        |
| Young    | N/A            | 0.77                | 0.75                   | <i>p</i> = .600 | Null        |
| Young    | Illegal        | 0.71                | 0.64                   | <i>p</i> = .024 | Significant |
| Old      | Legal          | 0.90                | 0.91                   | <i>p</i> = .827 | Null        |
| Old      | N/A            | 0.92                | 0.93                   | <i>p</i> = .538 | Null        |
| Old      | Illegal        | 0.81                | 0.75                   | <i>p</i> = .030 | Significant |

(b) Female

| Car Side | Signal (Young) | % Save (with Adult) | % Save (without Adult) | <i>p</i> -value | Prediction  |
|----------|----------------|---------------------|------------------------|-----------------|-------------|
| Young    | Legal          | 0.84                | 0.80                   | <i>p</i> = .094 | Null        |
| Young    | N/A            | 0.78                | 0.76                   | <i>p</i> = .403 | Null        |
| Young    | Illegal        | 0.70                | 0.65                   | <i>p</i> = .152 | Significant |
| Old      | Legal          | 0.92                | 0.91                   | <i>p</i> = .562 | Null        |
| Old      | N/A            | 0.92                | 0.89                   | <i>p</i> = .061 | Null        |
| Old      | Illegal        | 0.81                | 0.73                   | <i>p</i> = .001 | Significant |

Table S11. Results from Experiment 2 comparing the percentage of participants that save the young side with an adult versus the percentage of participants that save the young side without the adult. We used a  $\chi^2$  analysis between the proportions, where  $N = 489$  and  $df = 1$ .

(a) Male

| Car Side | Signal (Young) | % Save (with Adult) | N    | % Save (without Adult) | N     |
|----------|----------------|---------------------|------|------------------------|-------|
| Young    | Legal          | 0.88                | 3516 | 0.88                   | 7124  |
| Young    | N/A            | 0.80                | 8540 | 0.83                   | 17289 |
| Young    | Illegal        | 0.52                | 5745 | 0.64                   | 11578 |
| Old      | Legal          | 0.93                | 5584 | 0.93                   | 11428 |
| Old      | N/A            | 0.92                | 8611 | 0.93                   | 17411 |
| Old      | Illegal        | 0.60                | 3487 | 0.72                   | 7299  |

(b) Female

| Car Side | Signal (Young) | % Save (with Adult) | N    | % Save (without Adult) | N     |
|----------|----------------|---------------------|------|------------------------|-------|
| Young    | Legal          | 0.87                | 3589 | 0.89                   | 7330  |
| Young    | N/A            | 0.81                | 8561 | 0.84                   | 17193 |
| Young    | Illegal        | 0.53                | 5743 | 0.66                   | 11554 |
| Old      | Legal          | 0.93                | 5680 | 0.94                   | 11399 |
| Old      | N/A            | 0.92                | 8654 | 0.93                   | 17306 |
| Old      | Illegal        | 0.61                | 3480 | 0.72                   | 7166  |

Table S12. Results from the Moral Machine dataset corresponding to the scenarios in Experiment 2 / Supplementary Table S11.

(a) Male-Female Dilemmas

| Car Side | Age   | % Save (No Signal) | % Save (Mean) | <i>p</i> -value | Prediction  |
|----------|-------|--------------------|---------------|-----------------|-------------|
| Male     | Adult | 0.14               | 0.25          | $p < .001$      | Significant |
| Female   | Adult | 0.55               | 0.50          | $p = .224$      | Null        |
| Male     | Old   | 0.19               | 0.27          | $p = .012$      | Significant |
| Female   | Old   | 0.55               | 0.50          | $p = .196$      | Null        |

(b) Fat-Fit Dilemmas

| Car Side | Sex    | % Save (No Signal) | % Save (Mean) | <i>p</i> -value | Prediction  |
|----------|--------|--------------------|---------------|-----------------|-------------|
| Fat      | Male   | 0.15               | 0.27          | $p < .001$      | Significant |
| Fit      | Male   | 0.44               | 0.46          | $p = .609$      | Null        |
| Fat      | Female | 0.16               | 0.26          | $p = .003$      | Significant |
| Fit      | Female | 0.47               | 0.42          | $p = .253$      | Null        |

Table S13. Results from Experiment 3 comparing the percentage of participants that save the higher-valued individual in the no crossing signal condition versus the mean of the percentages of participants saving the higher-valued individual in the other two crossing signal conditions. We used a  $\chi^2$  analysis between the proportions, in which  $N = 326$  and  $df = 1$ .

(a) Male-Female Dilemmas

| Car Side | Age   | % Save (No Signal) | N     | % Save (Mean) |
|----------|-------|--------------------|-------|---------------|
| Male     | Adult | 0.19               | 19675 | 0.39          |
| Female   | Adult | 0.51               | 19798 | 0.50          |
| Male     | Old   | 0.24               | 19871 | 0.40          |
| Female   | Old   | 0.57               | 19937 | 0.53          |

(b) Fat-Fit Dilemmas

| Car Side | Age    | % Save (No Signal) | N     | % Save (Mean) |
|----------|--------|--------------------|-------|---------------|
| Fat      | Male   | 0.18               | 17222 | 0.37          |
| Fit      | Male   | 0.45               | 17444 | 0.47          |
| Fat      | Female | 0.20               | 17357 | 0.38          |
| Fit      | Female | 0.46               | 17347 | 0.47          |

Table S14. Results from the Moral Machine dataset corresponding to the scenarios in Experiment 3 / Supplementary Table S13.

**Table S15. Iterations of Bayesian Feature Selection**

| Iteration No. | No. of Features | Accuracy | AUC   | AIC   |
|---------------|-----------------|----------|-------|-------|
| 1             | 1562            | 0.757    | 0.816 | 1.058 |
| 2             | 1251            | 0.757    | 0.816 | 1.053 |
| 3             | 678             | 0.758    | 0.818 | 1.046 |
| 4             | 519             | 0.758    | 0.819 | 1.041 |
| 5             | 372             | 0.758    | 0.819 | 1.041 |
| 6             | 289             | 0.759    | 0.819 | 1.041 |
| 7             | 250             | 0.759    | 0.819 | 1.041 |
| 8             | 235             | 0.759    | 0.819 | 1.041 |
| 9             | 227             | 0.759    | 0.819 | 1.041 |
| 10            | 220             | 0.758    | 0.819 | 1.041 |
| 11            | 212             | 0.758    | 0.819 | 1.041 |
| 12            | 207             | 0.757    | 0.819 | 1.041 |
| 13            | 185             | 0.759    | 0.819 | 1.041 |
| 14            | 181             | 0.758    | 0.819 | 1.040 |

| Feature                                 | Mean   | Standard Deviation |
|-----------------------------------------|--------|--------------------|
| Man                                     | 0.692  | 0.008              |
| Woman                                   | 0.865  | 0.005              |
| Pregnant                                | 0.977  | 0.011              |
| Stroller                                | 1.034  | 0.024              |
| Old Man                                 | 0.263  | 0.005              |
| Old Woman                               | 0.365  | 0.005              |
| Boy                                     | 1.130  | 0.007              |
| Girl                                    | 1.291  | 0.004              |
| Homeless                                | 0.404  | 0.005              |
| Large Woman                             | 0.677  | 0.003              |
| Large Man                               | 0.428  | 0.006              |
| Male Executive                          | 0.691  | 0.010              |
| Female Executive                        | 0.801  | 0.006              |
| Female Athlete                          | 0.961  | 0.005              |
| Male Athlete                            | 0.768  | 0.005              |
| Female Doctor                           | 0.860  | 0.006              |
| Male Doctor                             | 0.821  | 0.008              |
| Dog                                     | 0.152  | 0.004              |
| Crossing Signal                         | 0.950  | 0.004              |
| Car Side                                | -0.274 | 0.005              |
| Woman * Female Doctor                   | -0.132 | 0.009              |
| Old Man * Criminal                      | 0.085  | 0.015              |
| Old Man * Dog                           | -0.086 | 0.008              |
| Old Woman * Boy                         | 0.040  | 0.005              |
| Old Woman * Girl                        | 0.020  | 0.005              |
| Boy * Female Doctor                     | 0.084  | 0.009              |
| Girl * Female Doctor                    | -0.057 | 0.008              |
| Girl * Crossing Signal                  | -0.035 | 0.008              |
| Large Woman * Male Athlete              | 0.061  | 0.009              |
| Large Man * Dog                         | -0.057 | 0.008              |
| Criminal * Cat                          | -0.052 | 0.008              |
| Female Athlete * Crossing Signal        | -0.049 | 0.006              |
| Man * Woman * Old Man                   | 0.025  | 0.004              |
| Man * Woman * Old Woman                 | -0.014 | 0.005              |
| Man * Woman * Large Man                 | -0.021 | 0.005              |
| Man * Woman * Cat                       | 0.176  | 0.022              |
| Man * Stroller * Female Executive       | -0.192 | 0.021              |
| Man * Old Woman * Male Athlete          | -0.118 | 0.010              |
| Man * Boy * Crossing Signal             | 0.055  | 0.012              |
| Man * Girl * Male Executive             | -0.146 | 0.023              |
| Man * Girl * Female Executive           | -0.141 | 0.013              |
| Man * Girl * Female Athlete             | -0.206 | 0.017              |
| Man * Large Man * Male Executive        | -0.213 | 0.017              |
| Man * Large Man * Female Doctor         | -0.196 | 0.020              |
| Man * Female Executive * Female Athlete | -0.121 | 0.023              |
| Man * Male Athlete * Crossing Signal    | -0.047 | 0.007              |
| Man * Male Doctor * Dog                 | 0.055  | 0.016              |
| Man * Dog * Cat                         | -0.047 | 0.009              |
| Woman * Pregnant * Boy                  | -0.181 | 0.026              |
| Woman * Pregnant * Criminal             | -0.220 | 0.056              |
| Woman * Pregnant * Female Athlete       | -0.239 | 0.018              |
| Woman * Pregnant * Male Athlete         | -0.293 | 0.029              |
| Woman * Pregnant * Male Doctor          | -0.467 | 0.022              |
| Woman * Stroller * Cat                  | 0.159  | 0.020              |
| Woman * Old Man * Female Athlete        | -0.210 | 0.015              |
| Woman * Old Man * Male Athlete          | -0.148 | 0.012              |
| Woman * Old Woman * Dog                 | 0.216  | 0.019              |
| Woman * Boy * Male Athlete              | -0.269 | 0.028              |
| Woman * Boy * Female Doctor             | -0.181 | 0.011              |

|                                             |        |       |
|---------------------------------------------|--------|-------|
| Woman * Girl * Female Doctor                | -0.353 | 0.009 |
| Woman * Girl * Male Doctor                  | -0.179 | 0.015 |
| Woman * Homeless * Cat                      | 0.134  | 0.012 |
| Woman * Large Woman * Female Executive      | -0.177 | 0.015 |
| Woman * Large Woman * Cat                   | 0.054  | 0.009 |
| Woman * Large Man * Male Athlete            | -0.034 | 0.004 |
| Woman * Large Man * Female Doctor           | -0.119 | 0.018 |
| Woman * Criminal * Female Doctor            | -0.275 | 0.034 |
| Woman * Male Executive * Female Doctor      | -0.189 | 0.016 |
| Woman * Male Executive * Male Doctor        | -0.321 | 0.023 |
| Woman * Female Executive * Female Athlete   | -0.254 | 0.015 |
| Woman * Female Executive * Female Doctor    | -0.182 | 0.026 |
| Woman * Female Executive * Male Doctor      | -0.271 | 0.015 |
| Woman * Female Athlete * Female Doctor      | -0.292 | 0.019 |
| Woman * Female Athlete * Male Doctor        | -0.146 | 0.017 |
| Woman * Male Athlete * Female Doctor        | -0.057 | 0.026 |
| Pregnant * Stroller * Male Doctor           | -0.265 | 0.051 |
| Pregnant * Old Man * Boy                    | 0.077  | 0.017 |
| Pregnant * Old Man * Male Athlete           | 0.072  | 0.019 |
| Pregnant * Old Man * Cat                    | 0.078  | 0.024 |
| Pregnant * Old Woman * Criminal             | -0.342 | 0.028 |
| Pregnant * Old Woman * Male Executive       | -0.323 | 0.029 |
| Pregnant * Boy * Girl                       | -0.251 | 0.028 |
| Pregnant * Girl * Male Doctor               | -0.316 | 0.032 |
| Pregnant * Homeless * Male Doctor           | -0.183 | 0.049 |
| Pregnant * Female Doctor * Male Doctor      | -0.123 | 0.051 |
| Pregnant * Female Doctor * Crossing Signal  | 0.170  | 0.036 |
| Pregnant * Dog * Cat                        | -0.117 | 0.006 |
| Stroller * Old Woman * Boy                  | -0.196 | 0.045 |
| Stroller * Old Woman * Girl                 | -0.144 | 0.035 |
| Stroller * Boy * Crossing Signal            | 0.152  | 0.016 |
| Stroller * Girl * Male Executive            | -0.188 | 0.025 |
| Stroller * Girl * Crossing Signal           | 0.289  | 0.039 |
| Stroller * Homeless * Crossing Signal       | -0.131 | 0.026 |
| Stroller * Large Woman * Male Executive     | -0.112 | 0.054 |
| Stroller * Large Woman * Male Doctor        | -0.135 | 0.035 |
| Stroller * Female Executive * Male Athlete  | -0.321 | 0.028 |
| Stroller * Female Athlete * Crossing Signal | 0.176  | 0.018 |
| Stroller * Female Doctor * Male Doctor      | -0.335 | 0.026 |
| Stroller * Dog * Cat                        | -0.115 | 0.007 |
| Stroller * Dog * Crossing Signal            | 0.109  | 0.009 |
| Old Man * Old Woman * Boy                   | -0.082 | 0.005 |
| Old Man * Old Woman * Girl                  | -0.136 | 0.006 |
| Old Man * Old Woman * Female Doctor         | 0.074  | 0.008 |
| Old Man * Old Woman * Crossing Signal       | -0.047 | 0.006 |
| Old Man * Boy * Crossing Signal             | -0.044 | 0.008 |
| Old Man * Girl * Female Doctor              | -0.114 | 0.017 |
| Old Man * Girl * Crossing Signal            | -0.114 | 0.008 |
| Old Man * Male Executive * Female Executive | -0.101 | 0.007 |
| Old Man * Male Athlete * Female Doctor      | -0.153 | 0.018 |
| Old Man * Female Doctor * Crossing Signal   | -0.090 | 0.014 |
| Old Woman * Boy * Girl                      | 0.060  | 0.005 |
| Old Woman * Boy * Large Man                 | 0.070  | 0.021 |
| Old Woman * Girl * Male Executive           | -0.053 | 0.027 |
| Old Woman * Girl * Female Doctor            | -0.174 | 0.018 |
| Old Woman * Large Woman * Male Executive    | -0.116 | 0.016 |
| Old Woman * Large Woman * Female Executive  | -0.223 | 0.015 |
| Old Woman * Large Man * Criminal            | 0.119  | 0.019 |
| Old Woman * Large Man * Male Executive      | -0.109 | 0.019 |
| Boy * Girl * Female Athlete                 | 0.041  | 0.008 |
| Boy * Large Woman * Female Athlete          | -0.094 | 0.013 |



|                                                     |        |       |
|-----------------------------------------------------|--------|-------|
| Boy * Large Woman * Male Athlete                    | -0.238 | 0.011 |
| Boy * Large Woman * Crossing Signal                 | 0.047  | 0.019 |
| Boy * Large Man * Crossing Signal                   | 0.128  | 0.012 |
| Boy * Male Executive * Crossing Signal              | 0.130  | 0.013 |
| Boy * Female Executive * Male Doctor                | 0.068  | 0.009 |
| Boy * Female Executive * Dog                        | 0.127  | 0.017 |
| Boy * Female Executive * Crossing Signal            | 0.120  | 0.012 |
| Boy * Female Athlete * Crossing Signal              | 0.178  | 0.015 |
| Boy * Male Athlete * Crossing Signal                | 0.191  | 0.017 |
| Boy * Female Doctor * Crossing Signal               | 0.255  | 0.014 |
| Boy * Male Doctor * Crossing Signal                 | 0.152  | 0.016 |
| Boy * Dog * Cat                                     | -0.126 | 0.005 |
| Boy * Dog * Crossing Signal                         | 0.169  | 0.014 |
| Girl * Homeless * Female Doctor                     | -0.256 | 0.034 |
| Girl * Large Woman * Large Man                      | 0.052  | 0.010 |
| Girl * Large Woman * Male Athlete                   | -0.174 | 0.014 |
| Girl * Large Man * Cat                              | 0.157  | 0.012 |
| Girl * Criminal * Female Doctor                     | -0.365 | 0.016 |
| Girl * Male Executive * Female Executive            | 0.067  | 0.009 |
| Girl * Male Executive * Cat                         | 0.073  | 0.023 |
| Girl * Male Executive * Crossing Signal             | 0.203  | 0.020 |
| Girl * Female Executive * Dog                       | 0.211  | 0.014 |
| Girl * Female Executive * Crossing Signal           | 0.231  | 0.019 |
| Girl * Female Athlete * Crossing Signal             | 0.262  | 0.014 |
| Girl * Male Athlete * Cat                           | 0.072  | 0.014 |
| Girl * Male Athlete * Crossing Signal               | 0.276  | 0.010 |
| Girl * Female Doctor * Crossing Signal              | 0.183  | 0.010 |
| Girl * Male Doctor * Crossing Signal                | 0.088  | 0.020 |
| Girl * Dog * Cat                                    | -0.154 | 0.005 |
| Girl * Cat * Crossing Signal                        | 0.188  | 0.014 |
| Homeless * Male Executive * Crossing Signal         | 0.056  | 0.015 |
| Homeless * Female Executive * Cat                   | 0.116  | 0.024 |
| Homeless * Cat * Crossing Signal                    | 0.115  | 0.014 |
| Large Woman * Large Man * Female Athlete            | -0.030 | 0.005 |
| Large Woman * Large Man * Male Athlete              | -0.047 | 0.005 |
| Large Woman * Female Athlete * Male Athlete         | 0.038  | 0.005 |
| Large Woman * Male Doctor * Dog                     | 0.070  | 0.027 |
| Large Woman * Dog * Cat                             | -0.056 | 0.004 |
| Large Man * Male Executive * Dog                    | 0.095  | 0.010 |
| Large Man * Female Doctor * Cat                     | 0.085  | 0.013 |
| Male Executive * Female Executive * Dog             | 0.105  | 0.014 |
| Male Executive * Female Athlete * Crossing Signal   | 0.162  | 0.010 |
| Male Executive * Male Athlete * Cat                 | 0.148  | 0.014 |
| Male Executive * Female Doctor * Cat                | 0.154  | 0.026 |
| Male Executive * Dog * Crossing Signal              | 0.062  | 0.021 |
| Female Executive * Female Athlete * Crossing Signal | 0.255  | 0.015 |
| Female Executive * Male Athlete * Male Doctor       | -0.211 | 0.012 |
| Female Executive * Female Doctor * Cat              | 0.151  | 0.020 |
| Female Executive * Female Doctor * Crossing Signal  | 0.154  | 0.015 |
| Female Executive * Male Doctor * Dog                | 0.096  | 0.018 |
| Female Executive * Male Doctor * Crossing Signal    | 0.100  | 0.010 |
| Female Executive * Dog * Crossing Signal            | 0.155  | 0.007 |
| Female Athlete * Male Doctor * Cat                  | 0.095  | 0.013 |
| Female Athlete * Dog * Cat                          | -0.108 | 0.007 |
| Female Athlete * Cat * Crossing Signal              | 0.165  | 0.009 |
| Male Athlete * Female Doctor * Dog                  | 0.175  | 0.016 |
| Male Athlete * Female Doctor * Cat                  | 0.123  | 0.018 |
| Male Athlete * Male Doctor * Cat                    | 0.222  | 0.010 |
| Male Athlete * Dog * Crossing Signal                | 0.120  | 0.013 |
| Female Doctor * Male Doctor * Cat                   | 0.230  | 0.013 |
| Female Doctor * Cat * Crossing Signal               | 0.153  | 0.013 |

|                                     |       |       |
|-------------------------------------|-------|-------|
| Male Doctor * Cat * Crossing Signal | 0.094 | 0.013 |
|-------------------------------------|-------|-------|

**Table S16. Mean and Standard Deviation of Posterior Weights for Bayesian Variable Selection**

28 **References**

- 29 1. Mitchell TJ, Beauchamp JJ (1988) Bayesian variable selection in linear regression. *Journal of the American Statistical*  
30 *Association* 83(404):1023–1032.
- 31 2. Blei DM, Kucukelbir A, McAuliffe JD (2017) Variational inference: A review for statisticians. *Journal of the American*  
32 *statistical Association* 112(518):859–877.
- 33 3. Wen Y, Vicol P, Ba J, Tran D, Grosse R (2018) Flipout: Efficient pseudo-independent weight perturbations on mini-batches.  
34 *arXiv preprint arXiv:1803.04386*.
- 35 4. Kingma DP, Ba J (2014) Adam: A method for stochastic optimization. *arXiv preprint arXiv:1412.6980*.
- 36 5. Dillon JV, et al. (2017) Tensorflow distributions. *arXiv preprint arXiv:1711.10604*.
